# Supplementary material for: CRISPR/Cas9 Genome Editing in Caenorhabditis elegans: Evaluation of Templates for Homology-Mediated Repair and Knock-Ins by Homology-Independent DNA Repair
Source: PubMed Central journal article supplement (PMC4528321; doi:10.1534/g3.115.019273), 2015-06-03
Supplement: supp_g3.115.019273_FigureS3.pdf [file supp_g3.115.019273_FigureS3.pdf]

Figure S3.

a) Sequence of the *lin-41* locus in N2 (partial)

*lin-41* coding sequence

genomic sgRNA site (**PAM** bold)

gccacggttggcgaacgggtaaaaaggaagagccgatcgctcgttactcaaggaaaaggct  
cgacgtcgctggaggaggaaaagttggtttttaggataaaaaccaacttaaagtacaaa  
agagccggaacggcgggaatgcgacgttgaaacgatcgtgatcctgaataaaggtagga  
acttttaataacaaagcaaaatgcgaaaatatattaaaaattaaaaacgtcgaaaaaaat  
taataaaatttttttatttcgaaaaattttgacctaccacaaattttttgactacttaat  
ttgttttttgttttttattttcgaatattaaattgaaagagcggcatttttctgattttccca  
tcaaaaatccttgatcagcagccctcgggccatttttctctcattttgttccattat  
catataaaaagtgcactttttttgtgcttactgactttttgttcgattaattgttccatt  
cgttctgaaaagtcaaaaaattcataagtattctaattgtagagtcacgtttgcccttcc  
actgataattaatcaaccttttcagacttggaagaaagtgaaATGGCGACCATCGTGCCATGC  
TCATTGGAGAAAAGAAGGAGCACCATCAGGACCTCGTCG**GCTTCAAAC**TGAGATCGAC**CGT**  
**GGACGCCAACGACAGCGGAAACGAGCTGTTCGATGGGCGGAAGCAGCAGTGAAG**gtaacactt  
gaaaattgaaaaaaaagcttccaacgaaacaacttcagGTGACTCAATGTCCCACCATCGCG  
GTGAGCATTACCAAACCATCATCATCAGGATAATCATCTTGGCTCGGGACCACCACCA  
CAGTTCACTGGCTCACTATTTGACACTCCACCGTCAATGATTAGTCACCACAGCAGCAACC  
ACAGTTCAGTTCACACTGGATTTCGGACTCGGACTCCCGCAAGACTCCTTTCCGGTGCTCAG  
TCTGCTCCAAGAGCTCGACGATTGGAGTGCTGCCGTTTCGTTTGTGCGCACAAgtggggttcc  
aagacaaattatcaaaatgacaattattttttagAACGTGCCAATCATGCTACCAGATGACAC  
CGTCTCGTACGATCGACGGGgtaataaataatctcaactttctgtatgatttatgaat  
agCTTGCAAGCTGTGTGGTGCCGTATCGACAGCCACCGCAACTTTACATCGCAGATGTACC  
TGTCTCCGACGCTTCCATCACCGCCACGTGGAGCTCTGATGTTCGGATTGTTTCGACACCAACG  
ATGAATAATCACATTAATTgtatgttttaattctcaatttacaccgaagaataacccaaatt  
ccagCATCAACTCCACTTCATCAACCTCGTGCATTCTCATTCTCACTCAGTGGAAATGCCTGG  
ATCACCGTCTCCAGTGATGGGTGCACGGATGCCATCGTCTGCTGGTGGGCTCATGATGCGTC  
CAATTGGATTCCCCGACTCGGACAGCAGTTTGCATCATGGTCTCCATTGCAACAACCATCA  
CAGCTTCTATCAATAATCTGTTCGAGCATCGGAGGACACCAGCAACAATCGCCGATGTTGAT  
GCAAAATGTGTTTGATTTCGTTGGCAGTGgtcagtttttatcaaatccaacagagaaaagt  
acaatttgtggagtgtggagctataaacaattcaatcccgaatttatgatgttatata  
ttatgtggtcgaaatcgaaaaatggttcaatcaggtttcgcgctcaatacctaacgaga  
cccaacttctgggggtggacctcgattaaaaaatgagcatttttctacggccccataatatt  
tcaaaaatcatttttttcgaaaaaaaagttagcatttctctcttcccaagaaacatatttt  
tctccctggcttcaataagttcaataagtcttttttctaatttttttggtaaatgcgcct  
cctgcgagctgaaattgcacctaattcctcgtattctttacagAACGATGATACTCCTGTAT  
TCTCTCACTCTCTCCAACGAATACTTCAATGCATATGCCACCATCATTGATGGCATCACCA  
GATGTTCCAAAACATTCTGCAACCATAGCTCCACCACGTAATTCATGTGCTCGACGCCAG  
TCTTCAATTGGCAACACCAATGTCTTCACAATCACAGCAAACCTTTTCAATTCTTACCAC  
TTGGATCTCAGCCACAACAACAGCCAATGGGTCCGATTCAATGTCAAGGATGCGAATCG  
AAAATgttagttttcccctaaaacttcaagataaattaaattatatttaaatttttcagATC  
GTTCGCCACTGTATGCAATGTCAGGAAGCTTTGTGTATTTCATTGTGTTCAAGCTCATCAGC  
GTGTTTCGAGCCACCAAACAACATGCGTTCGTTGAGCTTCAGCAGTTGATGGCTACTTTGgtt  
agtttttatcttatcgtgtgttactacacgctttttgcgctcacaacgacaattat  
tgaaatcataaaaagtatgcgcctttaaactgactgtaattaaacttttccattgtttt  
tcattaaatatttgtatattttatcgaaaacctaaaattaaaaattaaaccataaaaa  
atcgatgaaaattcacagctacaaaaatggaaactacagtactctttaaaggcgcacacct  
ttttgtagtttacaaaattgacattttgagacatgataccgtagtttgggagcaaaaaata

atatatgtggctctatattaatcaccttgatccgtttcaagattctccacgtgcttgatga  
cgtgaatcgtttgtaatcaggaatcataaaaagagtagcaataatcataaatcaatgactc  
ctgtcaatcaagaaaaaacacagaatcagtagcttttttgggtgatttttccgtttttaaatg  
tcttatcagtaactgattgcaggattagaacacaaaaattggctgccgaccggtccactaca  
ttagtaaaacttcttgaaaataactttttgaaaactatcaaggaaagtatttcagctcactt  
ttagatttttaaatgaaacttgtgtcagcagtttcacatttttcaacaaaaccaagttcca  
aaaagctcccagagtgtttgcttacctccaaacaccataaacatcaccaaaaagcttgcaaaa  
atccacatttcgaagaaaacaatttactgaaagcagtttcagagctgaaatactttccttac  
aagtttatagatttttctatccgaatatgtccacgtactaggaaattcccatttttcaacat  
ccaggcgttcggtttccctttttcttctccttcaaccaccttttttcgccattattcacaagc  
cagtcggaggcccaatttagtgccgagagagagagaggtgtctgctcctcatccggtgctct  
ttttgcaactatagtatttttttggctcggcgaacacgtaattcctctaaaatctaaaagta  
ttattttcagATGAGCCGTGCAGTTCAACCACAACAAGCACAGCAATACACTCAAATGTTG  
GAGGATCAGTTCGTCAAGCACTTGGATCAGTTGGAAGTGGAGATGgtatat

## b) Sequence of the *lin-41* locus in the *lin-41(bch28)* allele (partial)

*lin-41(bch28)*

*lin-41* coding sequence

remainder of the genomic sgRNA site

unknown

truncated GFP

*tbb-2* 3' UTR

*Peft-3* in reverse orientation

sgRNA site (reverse and complement) in the *Peft-*

*3::gfp::h2b::tbb-2* 3' UTR plasmid; one base is deleted between  
the nucleotides in red

plasmid sequence

gccacggttggcgaacgggtaaaaaggaagagccgatcgctcgttactcaaggaaaaggct  
cgacgtcgttgaggaggaaaagttggtttttaggataaaaaccaacttaaagtacaaaa  
agagccggaacggcgggaatgcgacgttggaacgatcgtgatcttgaataaagggtgagga  
acttttaataacaaagcaaaatgcaaaaatataaaaaattaaaaacgctgaaaaaaaat  
taataaaaatttttttattcgaaaaattttgacctaccacaaattttttgactacttaatttt  
ttgttttttgtttttattttcgaatattaaattgaaagagcggcattttttctgattttccca  
tcaaaaatccttgatcagcagccctcgggccattttttctctcattttgttccattat  
catataaaaagtgcactttttttgtgcttactgactttttttgttcgattaattgttccatt  
cgttctgaaaagtcaaaaaattcataagtattctaattgtagagtcacgtttgccctttcc  
actgataattaatcaaccttttcagacttggaaaaagtgaaATGGCGACCATCGTGCCATGC  
TCATTGGAGAAAAGAAGGAGCACCATCAGGACCTCGTCGggtgctcatcattggaa**caag**  
**accg**tcggttccaagccaaaggacggaagaagagacgcatgcccgcaaggaatcgtactc  
cgtctacatctaccgtgttctcaagcaagttcaccagacaccggagtctcctccaaggcca  
tgtctatcatgaactccttctgcaacgatgtattcgaacgatcgtctcggaagcttccggt  
cttgcctattacaacaaacgctcaacgatctcatcccgcgaaattcaaaccgctgtccggtt  
gattctcccaggagaacttgccaagcagccggtgtctgagggaa**ccaaggccg**tcaccaag**t**  
**acact**tcagcaagta**aa**accagctttcttgtacaaagtgggataaatgcaaaatcctttca  
agcattcccttcttctctatcactcttcttttctttttgtcaaaaaattctctcgctaattta  
tttgcttttttaatggttatttttatgactttttatagtcactgaaaagtttgcatctgag  
tgaagtgaatgctatcaaaatgtgattctgtctgatgtactttcacaatctctcttcaattc

cattttgaagtgctttaaacccgaaaggttgagaaaaatgcgagcgctcaaatatgttatt  
gtgttcggtgagtgaccaacaaaaagaggaaactttattgtgccgccaagaaaaagctc  
acaactatcgatcc [ UNKNOWN  
SEQUENCE ] CTCTCGGCGGGAGTGTTCATACTTTTTCTCTCTGGCAGTTTATTTTCAATAA  
ATTCTTCATTTTTATATTGTATAATGTCTTTATTTTATGAAAAATTCATTAATTTAACAGAA  
ACAATGGAAGAACCAATGGAAGTTGACAATAAAAAGACCAAAGGTGCcaacttttctatacaa  
agatctagatgcattcgcgaggtaccgagctcgCGTCCACGTGATCTCAGTTTGAAGCCGAC  
cactggccgctgcttttacaacgctcgtgactgggaaaaccctggcgttaccaacttaatcgc  
cttgcagcacatccccctttcgccagctggcgtaatagcgaagaggcccgaccgatcgcc  
ttcccaacagttgcgagcctgaatggcgaatggcgctgatgcggtattttctccttacgc  
atctgtgcggtatttcacaccgcatatggtgactctcagtacaatctgctctgatgccgca  
tagttaagccagccccgacaccgccaacaccgctgacgcgcccctgacgggcttgctgct  
cccggcatccgcttacagacaagctgtgaccgtctccgggagctgcatgtgtcagaggttt  
caccgtcatcaccgaaacgcgcgagacgaaagggcctcgtgatacgcctatttttataggtt  
aatgtcatgataataatggtttcttagacgtcaggtggcacttttccgggaaatgtgcgcg  
aacccctatttgtttatttttctaaatacattcaaatatgtatccgctcatgagacaataac  
cctgataaatgcttcaataatattgaaaaaggaagatgagattcaacatttccgtgct  
gcccttattccctttttgcgggcattttgcttccctgctttttgctcaccagaaacgctggt  
gaaagtaaaagatgctgaagatcagttgggtgcacgagtggttacatcgaactggatctca  
acagcggtaagatccttgagagttttcgccccgaagaacgttttccaatgatgagcactttT  
CGATGGGCGGAAGCAGCAGTGAAGgtaacacttgaaaattgaaaaaaaagcttccaacgaa  
caacttcagGTGACTCAATGTCCCACCATCGCGGTGAGCATTACCAAACCATCATCATCAG  
GATAATCATCTTGGCTCGGGACCACCACCACAGTTCACTGGCTCACTATTTGACACTCC  
ACCGTCAATGATTCAGTCACCACAGCAGCAACCACAGTTCAGTTCACACTGGATTCCGAC  
TCGGACTCCCGAAGACTCCTTTCGGTGTCTAGTCTGCTCCAAGAGCTCGACGATTGGAGTG  
CTGCCGTTTCGTTTGTGCGCACAAGtggggtttcaagacaaattatcaaaatgacaattat  
ttagAACGTGCCAATCATGCTACCAGATGACACCGTCTCGTACGATCGACGGGgtaataa  
atatctcaactttctgtatgatttatgaattttagCTTGCAAGCTGTGTGGTGCCGTATCGA  
CAGCCACCGCCAACCTTACATCGCAGATGTACCTGTCTCCGACGTTCCATCACCGCCACGT  
GGAGCTCTGATGTCGGATTGTTTCGACACCAACGATGAATAATCACATTAATTgtatgttta  
attctcaatttacaccgaagaataacccaaattccagCATCAACTCCACTTCATCAACCTCG  
TGCATTCTCATTCTCACTCAGTGGAAATGCCTGGATCACCGTCTCCAGTGATGGGTGCACGGA  
TGCCATCGTCTGCTGGTGGGCTCATGATGCGTCCAATTGGATTCCCCGACTCGGACAGCAGT  
TTGACATCATGGTCTCCATTGCAACAACCATCACAGCTTCTATCAATAATCTGTTCGAGCAT  
CGGAGGACACCAGCAACAATCGCCGATGTTGATGCAAAATGTGTTGATTGTTGGCAGTGg  
tcagtttttatcaaatttcaaacagagaaaaagtacaattttgtggagtggtggagctataaac  
aaattcaattttcccgaatttatgatgttatatattatgtggtcgcaaatcgaaaaatggttc  
aatttacggtttcgcccgtcaatacctaacgagaccaacttctgggggtggacctcgattaa  
aaaatgagcatttttctacggccccataatatttcaaaaatcatttttttcgaaaaaaaag  
ttagcatttctctcttcccaagaaacatatttttctccctggcttcaataagttcaataagt  
cttttttctaatttttttggctaaatgcccctcctgagctgaaattgcacctaatcct  
cgtatttcttacagAACGATGATACTCCTGTATTCTCTCCACTCTCTCCAACGAATACTTCA  
ATGCATATGCCACCATCATTGATGGCATCACAGATGTTCCAAAACATTCTGCAACCATAGC  
TCCACCACGTAATTCATGTGCTCGACGCCACGTCTTCAATTGGCAACACCAATGTCTTAC  
AATCACAGCAAACCTTTCCAATTCCTTACCCTTGGATCTCAGCCACAACAACAGCCA  
ATGGGTCCGATTCAATGTCAAGGATGCGAATCGAAAATgttagttttcccctaaaacttcaa  
agataatataattatattttaaatttttcagATCGTTCGCTACTGTATGCAATGTCAGGAAG  
CTTTGTGTATTCAATTGTGTTCAAGCTCATCAGCGTGTTCGAGCCACCAACAACATGCGTTC  
GTTGAGCTTCAGCAGTTGATGGCTACTTTGgtagtttttatcttatcgtgtgttactacac  
gctttttgctctcaacacgacaattattttttggaaattcataaaaagtatgcgctttaa  
aaacgtactgtaattaaacttttccattgtttttcatataatatttgtatatttatttatcg  
aaaacctaaaattaaaaattaaaaccataaaaaaatcgatgaaaattcacagctacaaaaatt

tgaaactacagtactctttaaggcgcacacctttttgtagtttacaaaaattgacattttg  
agacatgataccgtagtttgggagcaaaaaataatataatgtggtctatattaatcacctt  
gatccgtttcaagattctccacgtgcttgatgacgtgaatcgtttgtaatcaggaatcataa  
aaagagtacgcaataatcataaatcaatgactcctgtcaatcaagaaaaaacacagaatcag  
tacttttttgggtgtatttttccgttttttaaatgtcttatcagtaactgattgcaggattaga  
acacaaaaattggctgccgaccgttccactacattagtaaaacttcttgaaaataacttttt  
gaaaactatcaaggaaagtatttcagctcacttttagatttttaaatgaaacttggtgcagc  
agtttcacatttttcaacaaaaccaagttccaaaagctcccagagtgtttgcttacctcc  
aaacaccataaacatcacaaaagcttgcaaaaatccacatttcgaagaaaacaatttactg  
aaagcagtttcagagctgaaatactttccttacaagtttatagatttttctatccgaatatg  
tccacgtactaggaaattcccatttttcaacatccaggcgttcgtttccctttttcttctcc  
ttcaaccaccttttttcgccattattcacaagccagtcggagggccaatttagtgccgagag  
agagagaggtgtctgctcctcatccggtgctctttttgcactatagtattttttgctcg  
gcgaacacgtaattcctctaaaatctaaaagtattttttagATGAGCCGTGCAGTTCAAC  
CACAACAAGCACAGCAATACACTCAAAATGTTGGAGGATCAGTTCGTCAAGCACTTGGATCA  
GTTGGAAGTGGAGATGgtatat
