# Supplementary material for: CRISPR/Cas9 Genome Editing in Caenorhabditis elegans: Evaluation of Templates for Homology-Mediated Repair and Knock-Ins by Homology-Independent DNA Repair
Source: PubMed Central journal article supplement (PMC4528321; doi:10.1534/g3.115.019273), 2015-06-03
Supplement: supp_g3.115.019273_TableS3.pdf [file supp_g3.115.019273_TableS3.pdf]

**Table S3. Mutagenicity of four sgRNAs targeting *unc-22* correlate with predictions of the web tool based on the study of Doench *et al.* (2014)**

10 N2 animals were microinjected with a mix containing Cas9, one of the sgRNAs and a GFP marker. GFP positive F<sub>1</sub> animals were isolated and scored for segregation of Unc-22 twitcher animals. pIK214 sgRNA was modified so that the beginning nucleotide was A (underlined) instead of U, for improved transcription.

| <b>sgRNA</b>                                 | <b>Unc-22/fluorescent (%)</b> | <b>sgRNA design tool score</b> |
|----------------------------------------------|-------------------------------|--------------------------------|
| pIK206<br>5' GACAAGCCGAAACCACCAA 3'          | 16/99 (16)                    | 0.82                           |
| pIK199<br>5' GCUCCAUUGGUAUGGUACCG 3'         | 86/97 (89)                    | 0.76                           |
| pIK214<br>5' <u>A</u> UCCACGAUUCAUUUUGAAA 3' | 1/94 (1)                      | 0.05                           |
| pIK207<br>5' AAACAAUUUCCAGUAUGCC 3'          | 14/226 (6)                    | 0.04                           |
