# Supplementary material for: CRISPR/Cas9 Genome Editing in Caenorhabditis elegans: Evaluation of Templates for Homology-Mediated Repair and Knock-Ins by Homology-Independent DNA Repair
Source: PubMed Central journal article supplement (PMC4528321; doi:10.1534/g3.115.019273), 2015-06-03
Supplement: supp_g3.115.019273_TableS4.pdf [file supp_g3.115.019273_TableS4.pdf]

**Table S4. sgRNAs with published efficiency in *C. elegans* and their scores according to the Doench *et al.* (2014) algorithm**

sgRNAs were analyzed as in Farboud and Meyer (2015); sgRNAs from that study and ours were added and analyzed by the Doench *et al.* (2014) algorithm, at <http://www.broadinstitute.org/rnai/public/analysis-tools/sgrna-design>

| gene              | sequence                | sgRNA design tool score | efficiency (%) | reference                      |
|-------------------|-------------------------|-------------------------|----------------|--------------------------------|
| <i>Y62E10A.17</i> | ATACGCACCGATGCTCTCCG    | 0.89                    | 14             | Farboud and Meyer, 2015        |
| <i>unc-22</i>     | GACAAGCCGAAACCACCAAA    | 0.82                    | 16             | this study                     |
| <i>avr-14</i>     | GATTGGAGAGTTAGACCACG    | 0.79                    | 20             | Kim <i>et al.</i> , 2014       |
| <i>unc-22</i>     | GCTCCATTGGTATGGTACCG    | 0.76                    | 89             | this study                     |
| <i>fox-1</i>      | ATTACAGTGAAGTACAGCGG    | 0.75                    | 21             | Farboud and Meyer, 2015        |
| <i>dpy-11</i>     | GCAAGGATCTTCAAAAAGCA    | 0.75                    | 10             | Waaaijers <i>et al.</i> , 2013 |
| <i>lon-2</i>      | GGGAAACTATAACCTCACTG    | 0.68                    | 30             | Kim <i>et al.</i> , 2014       |
| <i>fox-1</i>      | ACAATTACAGTGAAGTACAG    | 0.67                    | 0              | Farboud and Meyer, 2015        |
| <i>rol-1</i>      | GGAGGTTGACTCCAATACTA    | 0.5                     | 1.4            | Waaaijers <i>et al.</i> , 2013 |
| <i>unc-4</i>      | GTTATCGTCATCCGGTGACG    | 0.46                    | 10             | Kim <i>et al.</i> , 2014       |
| <i>pie-1</i>      | GCTGAGAGAAGAATCCATCG    | 0.44                    | 15             | Kim <i>et al.</i> , 104        |
| <i>sex-1</i>      | AACATTTCCACAACGAGAGG    | 0.43                    | 51             | Farboud and Meyer, 2015        |
| <i>fox-1</i>      | AATATCGTTTACCAAAACGG    | 0.42                    | 13             | Farboud and Meyer, 2015        |
| <i>Y61A9LA.1</i>  | GGATGGATGTGTAGTCAATT    | 0.37                    | 18             | Friedland <i>et al.</i> , 2013 |
| <i>sex-1</i>      | TGGAACATTTCCACAACGAG    | 0.35                    | 8              | Farboud and Meyer, 2015        |
| <i>pie-1</i>      | GTTGAGTGCAGCCATTTGCT    | 0.35                    | 5              | Kim <i>et al.</i> , 2014       |
| <i>pie-1</i>      | GGACAAAGAGAGGGGGTGAG    | 0.34                    | 7.5            | Kim <i>et al.</i> , 2014       |
| <i>sex-1</i>      | AACGGATGAGAATCTGACAA    | 0.28                    | 21             | Farboud and Meyer, 2015        |
| <i>xol-1</i>      | AGCGATTTCTGGCGATTGGG    | 0.28                    | 10             | Farboud and Meyer, 2015        |
| <i>dpy-11</i>     | GATGCTTGAGTCTGGAAC      | 0.25                    | 0              | Kim <i>et al.</i> , 2014       |
| <i>klp-12</i>     | GATCCACAAGTTACAATTGG    | 0.23                    | 80.3           | Friedland <i>et al.</i> , 2013 |
| <i>pie-1</i>      | GGCTCAGATTGACGAGGCGC    | 0.21                    | 24             | Kim <i>et al.</i> , 2014       |
| <i>sex-1</i>      | CGCACCGATGCTCTCCGAGG    | 0.2                     | 54             | Farboud and Meyer, 2015        |
| <i>fox-1</i>      | ATATGAGGGGAGTGAGGCGG    | 0.18                    | 29             | Farboud and Meyer, 2015        |
| <i>unc-22</i>     | GAACCCGTTGCCGAATACAC    | 0.16                    | 5              | Kim <i>et al.</i> , 2014       |
| <i>sex-1</i>      | AAACCTGCCTCCTCTCGTTG    | 0.16                    | 0              | Farboud and Meyer, 2015        |
| <i>ben-1</i>      | GGATATCACTTCCCAGAACT    | 0.13                    | 0              | Kim <i>et al.</i> , 2014       |
| <i>lir-2</i>      | TTGACTCGTTCCATTTGAGC    | 0.11                    | 0              | Farboud and Meyer, 2015        |
| <i>C35E7.6</i>    | GGGCACCATACCGAGTGATG    | 0.1                     | 100            | Kim <i>et al.</i> , 2014       |
| <i>fox-1</i>      | TTGAATATCGTTTACCAAAA    | 0.1                     | 0              | Farboud and Meyer, 2015        |
| <i>lin-5</i>      | GGAGCTTACTGAGACTCTTC    | 0.09                    | 20.8           | Waaaijers <i>et al.</i> , 2013 |
| <i>bli-2</i>      | GGATTTGCTGCTACTGAATC    | 0.09                    | 0              | Kim <i>et al.</i> , 2014       |
| <i>avr-14</i>     | GAATATTGAAAGACTATGAT    | 0.08                    | 10             | Kim <i>et al.</i> , 2014       |
| <i>dpy-13</i>     | GGACATTGACACTAAAATCA    | 0.08                    | 0.5            | Friedland <i>et al.</i> , 2013 |
| <i>cpsf-2</i>     | CACTTTCAATTTGATAATGG    | 0.06                    | 54             | Farboud and Meyer, 2015        |
| <i>fox-1</i>      | CATTTGATATGAGGGGAGTG    | 0.06                    | 20             | Farboud and Meyer, 2015        |
| <i>unc-119</i>    | GTTATAGCCTGTTCCGTTAC    | 0.05                    | 4.9            | Waaaijers <i>et al.</i> , 2013 |
| <i>unc-22</i>     | (A)TCCACGATTCATTATTGAAA | 0.05                    | 1              | this study                     |

|                   |                      |          |     |                                |
|-------------------|----------------------|----------|-----|--------------------------------|
| <i>bli-2</i>      | GATGGACGGGATGGTAGAGA | 0.05     | 0   | Kim <i>et al.</i> , 2014       |
| <i>lir-2</i>      | AATCAGCCGAGATGTAAGTT | 0.05     | 0   | Farboud and Meyer, 2015        |
| <i>Y62E10A.17</i> | CGCACCGATGCTCTCCGAGG | 0.04     | 57  | Farboud and Meyer, 2015        |
| <i>unc-22</i>     | AAACAAATTTCCAGTATGCC | 0.04     | 6   | this study                     |
| <i>cpsf-2</i>     | AAACACTTTCAATTTGATAA | 0.03     | 0   | Farboud and Meyer, 2015        |
| <i>xol-1</i>      | TCTAGCGATTTCTGGCGATT | 0.01     | 0   | Farboud and Meyer, 2015        |
| <i>cpsf-2</i>     | GTGGTTGGGATGAGCGATTC | 0.01     | 0   | Farboud and Meyer, 2015        |
| <i>lir-2</i>      | GGCTGATTTTCGCAGTTCGG | no score | 72  | Farboud and Meyer, 2015        |
| <i>vet-2</i>      | GTTGGATCATAGGATACCGG | no score | 38  | Kim <i>et al.</i> , 2014       |
| <i>unc-119</i>    | GAATTTTCTGAAATTAAGA  | no score | 3.7 | Friedland <i>et al.</i> , 2013 |
| <i>lir-2</i>      | CTCGGCTGATTTTCGCAGTT | no score | 1   | Farboud and Meyer, 2015        |
| <i>unc-22</i>     | GCCTTTGCTTCGATTTTCTT | no score | 0   | Kim <i>et al.</i> , 2014       |
| <i>ben-1</i>      | GGGAGAAAGTGATTTGCAGT | no score | 0   | Kim <i>et al.</i> , 2014       |
| <i>unc-32</i>     | GATAGGAAGCATCAGATTGA | no score | 0   | Kim <i>et al.</i> , 2014       |
| <i>unc-32</i>     | GTTGCTGAACTGGGAGAGCT | no score | 0   | Kim <i>et al.</i> , 2014       |
